# Supplementary material for: Nitrogen deposition accelerates soil acidification in four Chinese forests
Source: Research Square preprint supplement (doi:10.21203/rs.3.rs-3775899/v1), 2023-12-25
Supplement: Supplementary file 1 [file fbf19b08e4d33aa65f53595d.docx]

**Supplementary information**

***Mineralogical properties of soils***

The mineral composition of clay fractions (< 2 m) was examined using the X-ray diffraction (XRD) method on oriented clay specimens subjected to Mg saturation, K saturation, and glycerol solvation. Heat treatments (350°C, 550°C) were also applied to K-saturated specimens. XRD patterns were obtained using an X-ray diffractometer (RINT 2000; Rigaku, Tokyo, Japan) with CuK radiation. Relative contents of mica (Mc), vermiculite (Vt), and quartz (Qz) were estimated using the following equations (Matsue and Wada, 1988, 1989):

Mc: , (Eq. 1)

Vt: , (Eq. 2)

Qz: , (Eq. 3)

where *I*1.0and *I*1.4 are the XRD intensities (peak heights) of K- and Mg-saturated, air-dried clay samples at 1.0 and 1.4 nm, respectively. The other 1.4 nm clay mineral, hydroxy-interlayered vermiculite (HIV), was estimated from the 1.4 nm peak height of K-saturated clay samples when chlorite was negligible (Matsue and Wada, 1989). Because small amounts of chlorite (Ch) were detected in our study, relative contents of HIV and chlorite were estimated from the 1.4 nm peak height of K-saturated clay samples. The intensity ratio of HIV and chlorite to 1.4 nm clay minerals were calculated as follows (Matsue and Wada, 1988):

HIV + Ch: , (Eq. 4)

{HIV + Ch} / 1.4-nm clay minerals: (Eq. 5)

The sum of the relative contents of Mc, Vt, HIV, and Ch equals 1.

***Clay mineralogical properties***

Mica and vermiculite were present in all the clay samples (Table S1), while smectite was present only in the less acidic SNY soils. The dominance of kaolinite suggests the intensive weathering and acidification in the other soils. An increase in HIV and chlorite in the deeper soil of DHS suggests Al leaching and its precipitation to form hydroxy-interlayered vermiculite.

**Reference**

Matsue, N., Wada, K. (1988) Interlayer materials of partially interlayered vermiculites in dystrochrepts derived from Tertiary sediments. Journal of Soil Science, 39, 155-162.

Matsue, N., Wada, K. (1989) Source minerals and formation of partially interlayered vermiculites in Dystrochrepts derived from Tertiary sediments. Journal of Soil Science, 40, 1-7.
